# Supplementary material for: Patients direct costs to undergo TB diagnosis
Source: PubMed Central journal article supplement (PMC4806474; doi:10.1186/s40249-016-0117-x), 2016-03-24

## التكاليف المباشرة على المرضى الذين يخضعون لتشخيص أعراض مرض السل

راشيل أندرسون دو كوفيفاس، لوفيت لوسون، نجلاء السنبل، ناشر الأغبيري، إيزابيل عربيد، جيفان شيرتشانده، امينونو نامدي، أبراهام أسيفا، محمد ياسين، صديق عبد الرحمن، جوشوا أوباسانيا، أولانريواجو اولاديميغي، دانييل جيميتشو، سالي ثيوبولد، أندرو رامزي، برتيل سكوابر، لويس كوفيفاس

### ملخص

**نبذة:** يعتبر العائق الرئيسي في علاج السل هو عملية تشخيص الأعراض التي تتطلب القيام بزيارات متعددة؛ واستخدام نظم مختلفة في توصيف التكاليف المرتبطة بالتشخيص، كما أنها غير قابلة للمقارنة مع غيرها من الأنظمة.

**الأساليب:** تركز هدفنا على وصف التكاليف المباشرة التي يتكبدها الكبار الذين يحضرون مراكز تشخيص أعراض السل في البلدان الأربعة والعوامل المرتبطة بمصروفات إجراءات التشخيص. شملت الدراسة أربع دراسات استقصائية مقطعية بين المرضى الذين يخضعون للفحص الروتيني المجعري للعينات في إثيوبيا، ونيبال، ونيجيريا، واليمن. الكبار < 18 سنة الذين لديهم أعراض سعال < 2 أسبوع تم تسجيلهم مقدماً. تم احتساب التكاليف المباشرة كميًا باستخدام استبيانات هيكلية. المرضى الذين يعانون من التكاليف < 75 ربيعياً اعتبرت تواجه ارتفاع النفقات (حالات) وقرنت مع المرضى الذين يعانون من التكاليف > 75 ربيعياً لتحديد العوامل المرتبطة بارتفاع النفقات.

**النتائج:** ظهر أن السبب في النفقات الرئيسية يعود إلى رسوم العيادة والانتقال. وحضر معظم المشاركين إلى المراكز مع رفاقهم. كما ارتبط ارتفاع النفقات بحضور المريض مع مرافقين الذين يقيمون في المناطق الريفية/ بلدات أخرى وكذلك بسبب الأمية.

**الاستنتاجات:** التكاليف التي يتكبدها المرضى تعتبر هائلة وتشارك مع خصائص مشتركة مع بلدان أخرى. ومن خلال استبعاد رسوم الاستخدام واتباع سياسات أكثر شفافية في فرض الرسوم والتعويض عن المصروفات المدفوعة إلى العيادات، فإنه يمكن الحد من آثار التكاليف المباشرة للتشخيص على زيادة حدة الفقر. وفي الأماكن ذات الموارد المحدودة، يمكن ترتيب أولويات الدعم لهؤلاء الأكثر تعرضاً لخطر ارتفاع النفقات؛ وأولئك الذين يعانون من الأمية، الذين يحضرون مع مرافقين لهم وكذلك القادمين من المناطق الريفية.

Translated from English version into Arabic by Lamya, through

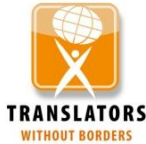

## تكاليف التشخيص المباشر للمرضى

Rachel M. Anderson de Cuevas, Lovett Lawson, Najla Al-Sonboli, Nasher Al-Aghbari, Isabel Arbide, Jeevan B. Sherchand, Emenyonu E Nnamdi, Abraham Aseffa, Mohammed A. Yassin, Sadiq T. Abdurrahman, Joshua Obasanya, Oladimeji Olanrewaju, Daniel Gemechu, Sally J. Theobald, Andrew Ramsay, S. Bertel Squire, Luis E. Cuevas

### المقدمة

**البيان:** علاج مرض السل يواجه تحدياً رئيسياً هو الحاجة إلى زيارات طبية متكررة؛ واستخدام نظم مختلفة في توصيف التكاليف المرتبطة بالتشخيص، كما أنها غير قابلة للمقارنة مع غيرها من الأنظمة.

**الطرق:** ركز هدفنا على وصف التكاليف المباشرة التي يتكبدها الكبار الذين يحضرون مراكز تشخيص أعراض السل في البلدان الأربعة والعوامل المرتبطة بمصروفات إجراءات التشخيص. شملت الدراسة أربع دراسات استقصائية مقطعية بين المرضى الذين يخضعون للفحص الروتيني المجعري للعينات في إثيوبيا، ونيبال، ونيجيريا، واليمن. الكبار < 18 سنة الذين لديهم أعراض سعال < 2 أسبوع تم تسجيلهم مقدماً. تم احتساب التكاليف المباشرة كميًا باستخدام استبيانات هيكلية. المرضى الذين يعانون من التكاليف < 75 ربيعياً اعتبرت تواجه ارتفاع النفقات (حالات) وقرنت مع المرضى الذين يعانون من التكاليف > 75 ربيعياً لتحديد العوامل المرتبطة بارتفاع النفقات.

的相关因素。

**结果：**研究表明，最主要的支出为门诊费用和交通费用。大部分受试者到诊断中心就诊均有人员陪同，高支出与陪同人员的参与，居住在农村地区/其他城镇及文盲有关。

**结论：**研究表明患者花费是很大的，且在各国之间有共同的模式。透明的收费政策和门诊费用的报销将有助于降低直接诊断成本造成的致贫效应。在资源有限的地区，建议优先支助有较高支付危险的人群，如文盲、有人员陪同的就诊者以及农村居民。

Translated from English version into Chinese by Feng Xinyu, edited by Yang Pin, through

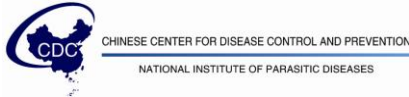

### **Coûts directs assumés par des patients dans le cadre du diagnostic de la TB**

Rachel M. Anderson de Cuevas, Lovett Lawson, Najla Al-Sonboli, Nasher Al-Aghbari, Isabel Arbide, Jeevan B. Sherchand, Emenyonu E Nnamdi, Abraham Aseffa, Mohammed A. Yassin, Saddiq T. Abdurrahman, Joshua Obasanya, Oladimeji Olanrewaju, Daniel Gemechu, Sally J. Theobald, Andrew Ramsay, S. Bertel Squire, Luis E. Cuevas

#### **Résumé**

**Contexte :** Un processus de diagnostic requérant plusieurs visites constitue un important obstacle au traitement de la TB. Les descriptions des coûts supportés par les patients associés au diagnostic reposent sur différents protocoles et ne sont pas comparables.

**Méthodes :** Notre objectif a été de décrire les coûts directs supportés par des adultes se rendant auprès de centres de diagnostic de la TB dans quatre pays différents ainsi que les facteurs associés aux dépenses de diagnostic. L'étude s'est composée de quatre sondages transversaux parmi des patients subissant des examens microscopiques de frottis de routine en Éthiopie, au Népal, au Nigeria et au Yémen. Des adultes > 18 ans atteints de toux > 2 semaines ont été recrutés de manière prospective. Les coûts directs ont été quantifiés en utilisant des questionnaires structurés. Nous avons considéré que les patients dont les coûts > 75<sup>ème</sup> percentile supportaient des dépenses élevées (cas) et nous les avons comparé avec des patients dont les coûts < 75<sup>ème</sup> percentile afin d'identifier des facteurs associés à des dépenses élevées.

**Résultats :** Les dépenses les plus significatives se rapportaient aux frais hospitaliers et aux frais de transport. La plupart des participants se sont présentés aux centres en étant accompagnés. Des dépenses élevées étaient associées au fait de se présenter en étant accompagné(e), à la résidence dans des régions rurales/d'autres villes et à l'analphabétisme.

**Conclusions :** Les coûts supportés par les patients sont substantiels et présentent des modèles communs dans les différents pays. La suppression des frais supportés par les patients, l'élaboration de politiques tarifaires transparentes et le remboursement des frais hospitaliers permettraient une réduction des effets des frais de diagnostic directs engendrant une certaine pauvreté. Dans les régions aux ressources limitées, un soutien pourrait être accordé en priorité aux personnes les plus à risque de présenter d'importantes dépenses, aux personnes analphabètes, aux personnes qui se rendent au service en étant accompagnées ainsi qu'aux personnes résidant dans des zones rurales.

Translated from English version into French by eric ragu, through

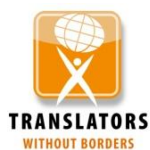

### **Прямые расходы пациентов на прохождение диагностики туберкулеза**

Рейчел М. Андерсон де Куэвас, Ловетт Лосон, Наджла Аль-Сонболи, Нашер Аль-Агбари, Изабель Арбиде, Дживан б. Шерчанд, Эменьону Э Ннамди, Абрахам Асеффа, Мохаммед А. Яссин, Саддик Т. Абдурахман, Джошуа Обасанья, Оладимеджи Оландеваджу, Даниэль Гемечу, Салли Дж. Теобальд, Эндрю Расей, С. Бертел Сквайр, Луис Э. Куэвас

#### **Аннотация**

**Предпосылки:** Основным препятствием для лечения туберкулеза является то, что диагностический процесс требует многократных явок. Описания расходов пациента, связанных с диагностикой, производятся по различным протоколам и являются несовместимыми.

**Методы:** Мы намеревались описать прямые расходы, которые несут взрослые, посещающие центры диагностики туберкулеза в четырех странах и факторы, связанные с расходами на диагностику. Исследование состояло из четырех перекрестных опросов пациентов, проходящих рутинную микроскопию мазка в Эфиопии, Непале, Нигерии и Йемене. Данные взрослых старше 18-ти лет с кашлем дольше двух недель регистрировались во временной перспективе. Прямые затраты количественно оценивались с помощью опросников. При идентификации факторов, связанных с высокими расходами, пациенты с расходами в квартили больше 75% считались представляющими (заболевание) с высокими расходами и сравнивались с пациентами с расходами в квартили меньше 75%.

**Результаты:** Наиболее значительные расходы приходились на выплаты клиникам и транспорт. Большинство участников посещало центры с сопровождающими. Высокие расходы были связаны с посещением с сопровождающими, проживанием в сельской местности/другом городе и неграмотностью.

**Выводы:** Расходы, которые несут пациенты, являются значительными и имеют общий характер в разных странах. Снятие оплаты с пользователя, прозрачная политика взимания оплаты и возмещение расходов клиник должны снизить усиливающие бедность эффекты стоимости прямой диагностики. В местах с ограниченными ресурсами следовало бы сделать приоритетной помощь тем, кто наиболее подвержен риску высоких расходов: неграмотным, посещающим службу в сопровождении других и сельским жителям.

Translated from English version into Russian by Alexander Somin, through

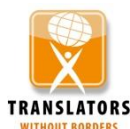

### **Costos directos del paciente para recibir diagnóstico de TB**

Rachel M. Anderson de Cuevas, Lovett Lawson, Najla Al-Sonboli, Nasher Al-Aghbari, Isabel Arbide, Jeevan B. Sherchand, Emeyonu E Nnamdi, Abraham Aseffa, Mohammed A. Yassin, Saddiq T. Abdurrahman, Joshua Obasanya, Oladimeji Olanrewaju, Daniel Gemechu, Sally J. Theobald, Andrew Ramsay, S. Bertel Squire, Luis E. Cuevas

## Resumen

**Antecedentes:** Un importante impedimento para el proceso de diagnóstico de la TB es que requiere de múltiples consultas. Las descripciones de los costos para el paciente asociados al diagnóstico utilizan distintos protocolos y no pueden compararse.

**Métodos:** Nuestro objetivo fue describir los costos directos en los que incurren pacientes adultos que asisten a centros de diagnóstico para la TB en cuatro países y los factores asociados a los gastos para el diagnóstico. El estudio estuvo compuesto de cuatro encuestas transversales a pacientes a los que se les practicaba microscopía electrónica de barrido de rutina en Etiopía, Nepal, Nigeria y Yemen. Se inscribió en el estudio a adultos mayores de 18 años con tos por más de dos semanas. Se cuantificaron los costos directos mediante el uso de cuestionarios estructurados. Se consideró que aquellos pacientes que tenían costos mayores al cuartil 75 tenían gastos elevados (casos) y se los comparó con pacientes que tenían costos menores al cuartil 75 para identificar los factores asociados a dichos gastos elevados.

**Resultados:** Los gastos más significativos fueron debido a aranceles de la clínica y transporte. La mayoría de los participantes asistieron a los centros con acompañantes. Los gastos elevados estaban asociados al asistir con acompañante, vivir en áreas rurales u otras aldeas y a analfabetismo.

**Conclusiones:** Los costos en los que incurren los pacientes son importantes y tienen patrones en común en los distintos países. El quitar los aranceles de usuario, la implementación de políticas de cobro transparentes y el reembolso de los gastos de la clínica reducirían los efectos inductores de pobreza de los costos directos de diagnóstico. En localidades con recursos limitados, debería darse prioridad al apoyo para aquellas personas que corren riesgo de mayores gastos; los analfabetos, a quienes asisten al servicio con acompañantes y a los residentes rurales.

Translated from English version into Spanish by Mpgorgone, through

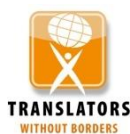

Supplement: 40249_2016_117_MOESM1_ESM.pdf [file 40249_2016_117_MOESM1_ESM.pdf]
